# Supplementary material for: Clinical Presentation, Pathological Spectrum, and Outcomes of Alcoholic Cirrhosis-Related Immunoglobulin A Nephropathy
Source: PubMed Central journal article supplement (PMC11069013; doi:10.1016/j.ekir.2024.02.1397), 2024-02-16
Supplement: mmc1.pdf [file mmc1.pdf]

## Supplemental material

|                                                         | <b>Cirrhosis-IgAN<br/>N= 46</b> | <b>Primary-IgAN<br/>N = 83</b> | <b>p</b>         |
|---------------------------------------------------------|---------------------------------|--------------------------------|------------------|
| <b>Clinical features at the time of Kidney biopsy</b>   |                                 |                                |                  |
| Age (years) mean $\pm$ SD                               | 64 $\pm$ 10                     | 44 $\pm$ 14                    | <b>&lt;0.001</b> |
| Female (%)                                              | 8 (17%)                         | 26 (31%)                       | 0.098            |
| History of hypertension (%)                             | 27 (59%)                        | 30 (36%)                       | <b>0.017</b>     |
| History of diabetes (%)                                 | 15 (33%)                        | 7 (8%)                         | <b>0.001</b>     |
| Tabaco user (%)                                         | 22 (48%)                        | 28 (34%)                       | 0.13             |
| Alcohol abuse (%)                                       | 46 (100%)                       | 5 (6%)                         | <b>&lt;0.001</b> |
| ACE or ARB users (%)                                    | 17 (37%)                        | 23 (28%)                       | 0.32             |
| <b>Laboratory findings at the time of Kidney biopsy</b> |                                 |                                |                  |
| Serum creatinine (mg/dL) mean $\pm$ SD                  | 3.52 $\pm$ 2.54                 | 2.1 $\pm$ 1.97                 | <b>0.0016</b>    |
| Acute kidney injury (%) <sup>£</sup>                    | 34/43 (79%)                     | 13/80 (16%)                    | <b>&lt;0.001</b> |
| Alternatives causes of AKI <sup>§</sup>                 | 21/34 (62%)                     | 4/13 (31%)                     | 0.1              |
| Dialysis (%)                                            | 8 (17%)                         | 4 (5%)                         | <b>0.0264</b>    |
| uPCR (g/g) median [IQR]                                 | 2.9 [1.4;4.6]                   | 2 [1.3;3.5]                    | <b>&lt;0.001</b> |
| uPCR $\geq$ 3 g/g (%)                                   | 21 (46%)                        | 28 (34%)                       | 0.19             |
| Macroscopic hematuria (%)                               | 8 (17%)                         | 12 (14.4%)                     | 0.8              |
| Low C3 (%)                                              | 7/34 (21%)                      | 1/48 (2%)                      | <b>0.0078</b>    |
| Low C4 (%)                                              | 5/34 (15%)                      | 0/48 (0%)                      | <b>0.01</b>      |
| <b>Histopathological characteristics</b>                |                                 |                                |                  |
| Glomeruli (n) mean $\pm$ SD                             | 14 $\pm$ 7                      | 14 +/- 6.9                     | 0.84             |
| Sclerotic glomeruli (%) mean $\pm$ SD                   | 17 $\pm$ 16                     | 23 +/- 21                      | 0.060            |
| MEST-C score, n (%)                                     | N = 39                          | N = 71                         |                  |
| M0/M1, n <sup>§</sup>                                   | 21/18                           | 46/25                          | 0.3              |
| E0/E1, n                                                | 25/14                           | 56/15                          | 0.11             |
| S0/S1, n                                                | 25/14                           | 14/57                          | <b>&lt;0.001</b> |
| T score $\geq$ 1, n                                     | 15                              | 31                             | 0.69             |
| C score $\geq$ 1, n                                     | 5                               | 17                             | 0.2              |
| Presence of interstitial infiltrate, n (%)              | 25 (54%)                        | 42 (51%)                       | 0.72             |
| Presence of acute tubular necrosis, n (%)               | 31 (67%)                        | 26 (31%)                       | <b>&lt;0.001</b> |
| Vascular lesion, n (%)                                  | 38 (83%)                        | 57 (69%)                       | 0.098            |
| Ischemic glomeruli, n (%)                               | 19 (41%)                        | 15 (18%)                       | <b>0.0063</b>    |
| Arteriolar hyalinosis, n (%)                            | 19 (41%)                        | 38 (46%)                       | 0.7              |
| Fibro-intimal thickening, n (%) <sup>*</sup>            | 30/43 (70%)                     | 34/76 (45%)                    | 0.012            |
| TMA, n (%)                                              | 2 (4%)                          | 9 (11%)                        | 0.33             |
| MPGN pattern, n (%)                                     | 9 (20%)                         | 4 (5%)                         | <b>0.013</b>     |

**Supplemental Table S1.** Cirrhosis-IgAN versus primitive IgAN at presentation.

**Abbreviation.** ACE or ARB, Angiotensin converting enzyme or Angiotensin receptor blockers; uPCR, urinary protein to creatinine ratio; MPGN, membranoproliferative glomerulonephritis.

£) 3 patients in the cirrhosis IgAN group and 3 patients in the primitive IgAN group had missing data concerning baseline serum creatinine value.

§) Alternatives causes of AKI in patients with primary IgAN; hearth failure n = 1, pyelonephritis n = 2, Diarrhea and vomiting n =1.

§) MEST-C score was used only in kidney biopsies samples with  $\geq 8$  glomeruli; 7 were excluded in the cirrhosis-IgAN group and 12 in the primitive IgAN group.

|                                            | Compensated cirrhosis n = 24 | Decompensated cirrhosis n= 22 | p             |
|--------------------------------------------|------------------------------|-------------------------------|---------------|
| <b>Clinical features at kidney biopsy</b>  |                              |                               |               |
| Age – years                                | 63±12                        | 65±8                          | 0.60          |
| Female                                     | 7 (29%)                      | 7 (32%)                       | 1             |
| History of hypertension                    | 14 (58%)                     | 13 (59%)                      | 1             |
| History of Diabetes                        | 6 (25%)                      | 9 (41%)                       | 0.23          |
| Causes of cirrhosis                        |                              |                               |               |
| Alcohol only                               | 13 (54%)                     | 16 (73%)                      | 0.23          |
| Mixed (alcohol and metabolic)              | 11 (46%)                     | 6 (27%)                       | 0.23          |
| ACE or ARB users                           | 11 (46%)                     | 6 (27%)                       | 0.23          |
| Purpura, n (%)                             | 7 (29%)                      | 4 (18%)                       | 0.496         |
| <b>Kidney features at kidney biopsy.</b>   |                              |                               |               |
| Serum creatinine                           | 3.5±2.4                      | 3.6± 2.7                      | 0.9           |
| Acute kidney injury                        | 16/21 <sup>§</sup> (67%)     | 18 (82%)                      | 0.72          |
| ICA stage 1                                | 3/16 (19%)                   | 4/18 (22%)                    |               |
| ICA stage 2                                | 2/16 (13%)                   | 5/18 (28%)                    |               |
| ICA stage 3                                | 11/16 (69%)                  | 9/18 (50%)                    |               |
| Alternative causes of acute kidney injury  | 7/16 (44%)                   | 14/18 (78%)                   | 0.076         |
| Dialysis                                   | 4 (17%)                      | 4 (18%)                       | 1             |
| uPCR (g/g)                                 | 2.2 [1.3;3.8]                | 3.4 [2.1;4]                   | 0.21          |
| <b>Histopathological characteristics</b>   |                              |                               |               |
| Glomeruli (n), mean ± SD                   | 14±7                         | 14±8                          | 0.82          |
| Sclerotic glomeruli (%), mean ±SD          | 17±19                        | 17±13                         | 0.94          |
| Presence of mesangial hypercellularity     | 7 (29%)                      | 17 (77%)                      | <b>0.0014</b> |
| Presence of endocapillary hypercellularity | 8 (33%)                      | 7 (32%)                       | 1             |
| Presence of FSGS lesion                    | 10 (42%)                     | 6 (27%)                       | 0.36          |
| Presence of crescent                       | 2 (8%)                       | 3 (14%)                       | 0.659         |
| Interstitial fibrosis $\geq 25\%$          | 8 (33%)                      | 9 (41%)                       | 0.76          |
| Presence of acute tubular necrosis         | 16 (67%)                     | 14 (64%)                      | 1             |
| Presence of Interstitial infiltrate        | 14 (58%)                     | 11 (50%)                      | 0.767         |
| Vascular lesion                            |                              |                               |               |
| Ischemic glomeruli, n (%)                  | 10 (42%)                     | 9 (41%)                       | 1             |
| Arteriolar hyalinosis,n (%)                | 10 (42%)                     | 9 (41%)                       | 1             |
| Fibro-intimal thickening, n (%)            | 16/24 (67%)                  | 14/19 (74%)                   | 0.74          |
| Thrombotic microangiopathy, n (%)          | 2 (8%)                       | 0 (0%)                        | 0.49          |
| MPGN pattern                               | 6 (25%)                      | 3 (14%)                       | 0.46          |

**Supplemental Table S2.** Clinical, laboratory and histological characteristics in patients with cirrhosis-IgAN according to the history of compensated or decompensated cirrhosis status.

**Abbreviation.** ACE or ARB, Angiotensin converting enzyme or Angiotensin receptor blocker; ICA, international club of ascites; uPCR, urinary protein to creatinine ratio; FSGS, focal segmental glomerulosclerosis; MPGN, membranoproliferative glomerulonephritis.

§) 3 patients had no serum creatinine baseline value.

\*) 2 patients in the cirrhosis group and 7 in the primary IgAN group had no arteries on kidney biopsy sample.

|                                          | <b>Cirrhosis-IgAN<br/>N= 46</b> | <b>Primitive IgAN<br/>N = 83</b> | <b>p</b>         |
|------------------------------------------|---------------------------------|----------------------------------|------------------|
| <b>Mesangial deposit</b>                 |                                 |                                  |                  |
| IgA                                      |                                 |                                  |                  |
| Number positive (%)                      | 45 (98%) <sup>§</sup>           | 83 (100%)                        | 1                |
| Number ≥ 2+ (%)*                         | 25/40 (63%)                     | 79 (95%)                         | <b>&lt;0.001</b> |
| IgG                                      |                                 |                                  |                  |
| Number positive (%)                      | 3 (7%)                          | 15 (18%)                         | 0.11             |
| Number ≥2+ (%)*                          | 0/40 (0%)                       | 7 (8%)                           | 0.09             |
| IgM                                      |                                 |                                  |                  |
| Number positive (%)                      | 16 (35%)                        | 51 (61%)                         | <b>0.006</b>     |
| Number ≥2+ (%)*                          | 2/40 (5%)                       | 7 (8%)                           | 0.72             |
| C3                                       |                                 |                                  |                  |
| Number positive (%)                      | 39 (85%)                        | 75 (90%)                         | 0.40             |
| Number ≥2+ (%)*                          | 19/40 (48%)                     | 55 (66%)                         | 0.052            |
| <b>Glomerular capillary wall deposit</b> |                                 |                                  |                  |
| IgA                                      |                                 |                                  |                  |
| Number positive (%)                      | 17 (37%)                        | 17 (20%)                         | 0.23             |
| Number ≥ 2+ (%)*                         | 14/40 (35%)                     | 13 (16%)                         | <b>0.02</b>      |
| IgG                                      |                                 |                                  |                  |
| Number positive (%)                      | 3 (7%)                          | 5 (6%)                           | 1                |
| Number ≥2+ (%)*                          | 2/40 (5%)                       | 1 (1%)                           | 0.25             |
| IgM                                      |                                 |                                  |                  |
| Number positive (%)                      | 4 (9%)                          | 6 (7%)                           | 0.74             |
| Number ≥2+ (%)*                          | 0/40 (0%)                       | 3 (4%)                           | 0.55             |
| C3                                       |                                 |                                  |                  |
| Number positive (%)                      | 17 (37%)                        | 12 (14%)                         | <b>0.005</b>     |
| Number ≥2+ (%)*                          | 10/40 (25%)                     | 9 (11%)                          | 0.06             |

**Supplemental Table S3. Immunofluorescence study in patients with cirrhosis-IgAN and primitive IgA nephropathy.**

\*)No semi quantitative analysis in 6 patients with cirrhosis-IgAN

§) One patient had IgA dominant or co-dominant deposit on glomeruli capillary loop but no mesangial deposit.

|                                                       | <b>MPGN<br/>pattern<br/>N = 9</b> | <b>Non MPGN<br/>pattern<br/>N = 37</b> | <b>P</b> |
|-------------------------------------------------------|-----------------------------------|----------------------------------------|----------|
| <b>Clinical features at the time of kidney biopsy</b> |                                   |                                        |          |
| Age (years) mean ±SD                                  | 66±10                             | 63±10                                  | 0.53     |
| Female (%)                                            | 3 (33%)                           | 5 (14%)                                | 0.18     |
| History of hypertension (%)                           | 6 (67%)                           | 21 (57%)                               | 0.72     |

|                                                           |               |                     |                  |
|-----------------------------------------------------------|---------------|---------------------|------------------|
| History of diabetes (%)                                   | 3 (33%)       | 12 (32%)            | 1                |
| History of decompensated cirrhosis, n (%)                 | 3 (33%)       | 19 (51%)            | 0.46             |
| Tabaco user (%)                                           | 6 (67%)       | 16 (43%)            | 0.28             |
| Purpura (%)                                               | 2 (22%)       | 9 (24%)             | 1                |
| Decompensated cirrhosis at the time of KB                 | 3 (33%)       | 10 (27%)            | 0.70             |
| <b>Laboratories findings at the time of Kidney biopsy</b> |               |                     |                  |
| Serum creatinine (mg/dL) mean $\pm$ SD                    | 4.8 $\pm$ 2.1 | 3.2 $\pm$ 2.6       | 0.07             |
| Acute kidney injury (%) <sup>§</sup>                      | 9 (100%)      | 25/34 (73%)         | 0.17             |
| Alternative causes of AKI, n (%)                          | 2 (22%)       | 19/25 (76%)         | <b>0.013</b>     |
| Dialysis (%)                                              | 4 (44%)       | 4 (11%)             | <b>0.036</b>     |
| uPCR (g/g) median [IQR]                                   | 7.7 [3;9]     | 2.2 [1.1;3.8]       | <b>0.014</b>     |
| Nephrotic syndrome                                        | 7 (78%)       | 7 (19%)             | <b>0.0016</b>    |
| Macroscopic hematuria (%)                                 | 2 (22%)       | 6 (16%)             | 0.64             |
| Low C3 (%)                                                | 3/7 (43%)     | 4/27 (15%)          | 0.13             |
| Low C4 (%)                                                | 2/7 (29%)     | 3/27 (11%)          | 0.27             |
| <b>Treatment and Outcomes</b>                             | N = 9         | N = 36 <sup>§</sup> |                  |
| ACE or ARB                                                | 4 (44%)       | 23 (64%)            | 0.45             |
| Steroids                                                  | 7 (78%)       | 2 (6%)              | <b>&lt;0.001</b> |
| At last follow up                                         |               |                     |                  |
| Follow up (months), median-[IQR]                          | 12 [5-63]     | 27 [11-62]          | 0.74             |
| CKD G3a-G5                                                | 7 (78%)       | 30 (83%)            | 0.65             |
| CKD G5                                                    | 5 (56%)       | 13 (36%)            | 0.24             |
| Severe infections, n (%)                                  | 4 (44%)       | 17 (47%)            | 1                |
| Death, n (%)                                              | 7 (78%)       | 20 (56%)            | 0.28             |

**Supplemental Table S4.** Cirrhosis associated IgA nephropathy according to the presence of membranoproliferative pattern on light microscopy.

**Abbreviation.** ACE or ARB, Angiotensin converting enzyme or Angiotensin receptor blockers; uPCR, urinary protein to creatinine ratio; MPGN, membranoproliferative glomerulonephritis.

\*) Excluding patients on dialysis.

§) One patient had missing data about treatment and outcome.

|                                         | <b>Compensated<br/>Cirrhosis<br/>N = 24</b> | <b>Decompensated<br/>cirrhosis<br/>N = 21<sup>§</sup></b> | <b>p</b> |
|-----------------------------------------|---------------------------------------------|-----------------------------------------------------------|----------|
| Follow up years (months) median-[IQR]   | 26 [5-56]                                   | 24 [12-53]                                                | 0.98     |
| <b>Treatment</b>                        |                                             |                                                           |          |
| ACE or ARB                              | 13 (54%)                                    | 14 (67%)                                                  | 0.54     |
| Steroids                                | 5 (21%)                                     | 4 (19%)                                                   | 1        |
| <b>Outcomes</b>                         |                                             |                                                           |          |
| <i>At 12 months</i>                     | N = 14                                      | N = 14                                                    |          |
| Serum creatinine (mg/dL) mean $\pm$ SD* | 1.4 $\pm$ 0.64                              | 1.97 $\pm$ 0.96                                           | 0.096    |

|                                        |               |             |       |
|----------------------------------------|---------------|-------------|-------|
| eGFR mean $\pm$ SD*                    | 68 $\pm$ 36   | 45 $\pm$ 24 | 0.088 |
| CKD G3a-G5                             | 9 (64%)       | 11 (79%)    | 0.68  |
| CKD G3a                                | 3 (21%)       | 2 (14%)     | 0.53  |
| CKD G3b                                | 2 (14%)       | 5 (36%)     | 0.38  |
| CKD G4                                 | 1 (7%)        | 2 (14%)     | 1     |
| CKD G5                                 | 3 (21%)       | 2 (14%)     | 1     |
| <i>At last follow up</i>               | N = 24        | N = 21      |       |
| Serum creatinine (mg/dL) mean $\pm$ SD | 2.3 $\pm$ 1.5 | 2 $\pm$ 1   | 0.5   |
| eGFR mean $\pm$ SD                     | 48 $\pm$ 33   | 45 $\pm$ 25 | 0.75  |
| CKD G3a-G5                             | 20 (83%)      | 17 (81%)    | 1     |
| CKD G3a                                | 3 (13%)       | 4 (19%)     | 0.69  |
| CKD G3b                                | 3 (13%)       | 2 (10%)     | 1     |
| CKD G4                                 | 3 (13%)       | 4 (19%)     | 0.69  |
| CKD G5                                 | 11 (45%)      | 7 (33%)     | 0.54  |
| Severe infections                      | 9 (38%)       | 12 (57%)    | 0.24  |
| Death                                  | 16 (67%)      | 11 (52%)    | 0.37  |
| Time to death (months), median [IQR]   | 12 [6-64]     | 16 [2-25]   | 0.22  |

**Supplemental Table S5.** Treatment and outcomes of patients with cirrhosis-IgAN according to the history of compensated or decompensated cirrhosis status.

**Abbreviation.** ACE or ARB, Angiotensin converting enzyme or Angiotensin receptor blocker.

§) One patient had missing data about treatment and outcome.

\*) excluding patients treated with dialysis

|                                         | Cirrhosis IgAN n =45 <sup>§</sup> |
|-----------------------------------------|-----------------------------------|
| <b>Treatment</b>                        |                                   |
| ACE or ARB                              | 27 (60%)                          |
| Side effect of ACE or ARB <sup>§</sup>  | 5/27 (19%)                        |
| Steroids                                | 9 (20%)                           |
| Steroids initiated intra-venously.      | 4 (9%)                            |
| <b>Outcomes</b>                         |                                   |
| Follow-up (month), median [IQR]         | 25 [5-62]                         |
| <i>At 12 months, n</i>                  | 28                                |
| Serum creatinine (mg/dL) mean $\pm$ SD* | 1.7 $\pm$ 0.9                     |
| eGFR mean $\pm$ SD*                     | 55 $\pm$ 32                       |
| CKD G3a-G5                              | 20 (71%)                          |
| CKD G3a                                 | 5 (18%)                           |
| CKD G3b                                 | 7 (25%)                           |
| CKD G4                                  | 3 (11%)                           |
| CKD G5                                  | 5 (18%)                           |
| <i>At last follow-up</i>                |                                   |
| Serum creatinine (mg/dL) mean $\pm$ SD* | 2.16 $\pm$ 1.3                    |
| eGFR mean $\pm$ SD*                     | 46 $\pm$ 29                       |
| CKD G3a-G5                              | 37 (82%)                          |
| CKD G3a                                 | 7 (16%)                           |
| CKD G3b                                 | 5 (11%)                           |
| CKD G4                                  | 7 (16%)                           |
| CKD G5                                  | 18 (40%)                          |
| Severe infections                       | 21 (47%)                          |

|                                     |                       |
|-------------------------------------|-----------------------|
| Death                               | 27 (60%)              |
| Time to death (months) median [IQR] | 15 [5-57]             |
| Causes of death                     |                       |
| Infections                          | 7 (26%)               |
| Decompensated cirrhosis             | 10 (37%) <sup>£</sup> |
| Malignancies                        | 6 (22%)               |
| Others                              | 3 (11%)               |
| Unknow                              | 1 (4%)                |

**Supplemental Table S6.** Management and outcomes of 45 patients with Cirrhosis-IgAN.

**Abbreviation.** ACE or ARB, Angiotensin converting enzyme or Angiotensin receptor blocker; eGFR, estimated glomerular filtration rate according to modification of diet in renal disease equation (MDRD).

§) One patient had missing data about treatment and outcome.

§) acute kidney injury n = 2, arterial hypotension n = 2, hyperkalemia n =1.

\*) excluding patients treated with dialysis

£) Patients which had decompensated cirrhosis induced by sepsis with further control of the sepsis were classified in “decompensated cirrhosis” group.
